- A-941** Room A, 10/17/2000 2:00 PM - 4:00 PM (PS)  
**Preoperative Oral Rofecoxib Does Not Decrease Postoperative Pain after Radical Prostatectomy. A Prospective, Randomized, Double-Blinded, Placebo-Controlled Trial** Jianhong Huang, MD; Akiko Taguchi, MD; Hawpeng Hsu, MD; Gerald L. Andriole, MD; Andrea Kurz, MD, *Anesthesiology and Surgery, Washington University, St Louis, MO, United States.* as above
- A-942** Room A, 10/17/2000 2:00 PM - 4:00 PM (PS)  
**Antiemetic Effect of Simultaneous Epidural Administration of Droperidol during Patient-Controlled Epidural Analgesia** Soichiro Inoue, M.D., Ph.D.; Masabiro Hiruta, M.D.; Hideo Suzuki, M.D.; Norimasa Seo, M.D., Ph.D., *Anesthesiology, Jichi Medical School, Kawachi-gun, Tochigi, Japan.* Epidurall droperidol in the PCEA with buprenorphine and bupivacaine decreases the intensity of the PONV after gynecological surgery.
- A-943** Room A, 10/17/2000 2:00 PM - 4:00 PM (PS)  
**PCA-Morphine with Either Ondansetron or Ondansetron and Prochlorperizine for Control of Pain, Nausea, and Vomiting in Patients Undergoing Abdominal Surgery** W. Scott Jellish, M.D., Ph.D.; E. Fluder, RN, MSN; S. Slogoff, M.D., *Anesthesiology, Loyola University Medical Center, Maywood, IL, United States.* Ondansetron or ondansetron + prochlorperizine given with PCA reduced PONV and improved satisfaction after surgery.
- A-944** Room A, 10/17/2000 2:00 PM - 4:00 PM (PS)  
**Single Dose Tolerability and Pharmacokinetics of Parecoxib Sodium, a COX-2 Specific Inhibitor Following Intramuscular Administration** Aziz Karim, Ph.D.; Aziz Laurent, MD; Michael Kuss, BS; Richard Hubbard, MD; Jiang Qian, Ph.D, *GD Searle & Co., Skokie, IL, United States.* Intramuscular administration of parecoxib, a prodrug, leads to rapid formation of valdecoxib a second generation COX-2 specific inhibitor.
- A-945** Room A, 10/17/2000 2:00 PM - 4:00 PM (PS)  
**Single Dose Tolerability and Pharmacokinetics of Parecoxib Sodium, a COX-2 Specific Inhibitor, Following Intravenous Administration** Aziz Karim, Ph.D.; Aziz Laurent, MD; Jiang Qian, Ph.D; Michael Kuss, BS; Richard Hubbard, MD, *GD Searle & Co., Skokie, IL, United States.* IV administration of the prodrug parecoxib leads to rapid formation of valdecoxib a second generation COX-2 specific inhibitor.
- A-946** Room A, 10/17/2000 2:00 PM - 4:00 PM (PS)  
**Contribution of Peripheral Capsaicin Receptors to Thermal Hyperalgesia in an Animal Model of Postoperative Pain** Yuji Kozuka, MD; Mikito Kawamata, MD; Rika Sekine, MD; Keiichi Omote, MD; Akiyoshi Namiki, MD, Ph.D, *Anesthesiology, Sapporo Medical University School of Medicine, Sapporo, Hokkaido, Japan.* A capsaicin receptor antagonist capsazepine suppressed incision-induced thermal hyperalgesia.
- A-947** Room A, 10/17/2000 2:00 PM - 4:00 PM (PS)  
**Efficacy of Preemptive Intrathecal Neostigmine for Postoperative Pain Relief** S.S. Kumar, MD; R. Chawla, MD; S. Gautam, MD, *Anesthesiology and Critical Care, UCMS, Dehli, Dehli, India.* Preemptive intrathecal neostigmine is effective for postoperative analgesia after TAH.
- A-948** Room A, 10/17/2000 2:00 PM - 4:00 PM (PS)  
**Efficacy of Spinal Cyclooxygenase (COX) Inhibitors and Clonidine (CLO) Combination To Relieve Mechanical Allodynia (MA) in an Animal Model of Neuropathic Pain** Patricia M. Lavand'homme, MD, Ph.D; Nathalie Renier; Marc De Kock, MD, Ph.D, *Anesthesiology, St Luc Hospital - Universite Catholique de Louvain, Brussels, Belgium.* Spinal COX inhibitors does not improve clonidine efficacy.
- A-949** Room A, 10/17/2000 2:00 PM - 4:00 PM (PS)  
**The Effect of Neuritis and Inflammatory Substances on Slowly Conducting Afferent Fibers** Jeong-Gill Leem, M.D., Ph.D.; Geoffrey M. Bove, D.C., Ph.D., *Anesthesia and Critical Care, Beth Israel Deaconess Medical Center and Harvard Medical School, Boston, MA, United States.* Using in-vivo electrophysiological methods, we report that sciatic nerve inflammation results in property changes of through-conducting axons.
- A-950** Room A, 10/17/2000 2:00 PM - 4:00 PM (PS)  
**Prophylaxis of Postoperative Pain by Balanced Intraoperative Analgesia** Winfried Meissner, M.D.; Juergen Eberitsch, *Clinic of Anesthesiology, Friedrich Schiller University, Jena, Germany.* Spinal blockade by bupivacain/morphine and a peripheral antinociception by local anesthetics and NSAID showed a better postoperative pain control than single interventions or general anesthesia.
- A-951** Room A, 10/17/2000 2:00 PM - 4:00 PM (PS)  
**The Inhibitory Effects of Anesthetics and Ethanol on Substance P Receptor Expressed in *Xenopus* Oocytes** Kouichiro Minami, M.D. Ph.D.; Yousuke Shiga, M.D.; Kenichiro Sagata, M.D.; Etsuko Nagaoka, M.D.; Akio Shigematsu, M.D. Ph.D., *Department of Anesthesiology, University of Occupational and Environmental Health, School of Medicine, Kitakyusbu, Fukuoka, Japan*
- A-952** Room A, 10/17/2000 2:00 PM - 4:00 PM (PS)  
**Cepharanthine Reduces Carrageenan-Induced Inflammatory Hyperalgesia by Inhibiting Neutrophil Activation in Rats** Akio Mizutani, M.D.; Kyosuke Kudo, M.D.; Masabiko Ichimata, M.D.; Shigenori Yosbitake, M.D.; Takayuki Noguchi, M.D., *Anesthesiology, Oita Medical University, Oita, Oita, Japan.* Cepharanthine could reduce carrageenin-induced hyperalgesia by inhibiting neutrophil activation in rats.
- A-953** Room A, 10/17/2000 2:00 PM - 4:00 PM (PS)  
**Problems with Epidural Analgesia for Postoperative Pain Control** Ju-Mei Ng, MMed; Meng-Huat Gob, MMed, *FANZCA, Anaesthesia & Surgical Intensive Care, Singapore General Hospital, Singapore.* This retrospective audit describes the common postoperative complications of epidural analgesia over a 1-year period, focussing on reasons for premature removal of the epidural catheter and inadequate analgesia.
- A-954** Room A, 10/17/2000 2:00 PM - 4:00 PM (PS)  
**Ulinastatin Reduces Carrageenan-Induced Inflammatory Hyperalgesia by Inhibiting Neutrophil Activation** Kentaro Okuda, M.D.; Akio Mizutani, M.D.; Kyosuke Kudo, M.D.; Masabiko Ichimata, M.D.; Takayuki Noguchi, M.D., *Anesthesiology, Oita Medical University, Oita, Oita, Japan.* Ulinastatin could reduce carrageenin-induced hyperalgesia by inhibiting neutrophil activation in rats
